# Supplementary material
Source: publisher site journal article supplement (https://www.dovepress.com/article/334471)
Supplement: Supplementary file 1 [file get_supplementary_file.php]

**Appendix. The Factors and Items of CFA Model for the HPAS-HSP Scale**

Factor 1: Personal Integrity and Accountability (9 items)

1. Medical professionals should strive to reject any violation of any personal or healthcare guidelines.
2. Medical professionals should strive to protect the rights and privacy of research participants.
3. Medical professionals should strive to abide by strict medical ethics and moral principles.
4. Medical professionals should strive to keep patients’ conditions and personal privacy confidential.
5. Medical professionals should strive to uphold the principles of social justice in the medical system and actively promote a fair distribution of limited medical resources.
6. Medical professionals should strive to inform patients about their conditions and treatment plans in detail and respect patients’ autonomy.
7. Medical professionals should avoid wasting medical resources and unnecessary medical tests, so as to prevent patients from suffering avoidable injuries and expenses.
8. Medical staff should make full use of medical resources in order to provide patients with the most appropriate healthcare.
9. Medical professionals should strive to give patients clear explanations about their health status.

Factor 2: Sensitivity to Others (5 items)

10. Medical professionals should devote themselves to listening to patients’ illness stories and empathizing with their pain and emotional reactions.

11. Medical professionals should listen to patients’ voices and respond to their concerns and preferences.

12. Medical professionals should strive to put themselves in their patients’ position to experience their pain or reactions.

13. Medical professionals should show their understanding toward their patients, pay attention to them, and offer them sympathy.

14. Medical professionals should show proper sympathy for patients’ pain and anxiety and try to reduce their pain, anxiety, and discomfort.

Factor 3: Medical Professional Competence (6 items)

15. Medical professionals should strive to provide patients with relevant medical information in order to help them reduce their pain and enhance their quality of life.

16. Medical professionals should demonstrate their ability to think critically and self-reflect.

17. Medical professionals should be committed to continuous self-learning and professional development, demonstrating their lifelong learning ability to improve their medical competency.

18. Medical professionals should strive to develop their communication skills in the medical field and demonstrate their ability to communicate with patients and related professionals to provide patients with the best medical care.

19. Medical professionals should strive to respect the privacy of patients and keep their medical conditions and personal information confidential under the constraints of the law.

20. Medical professionals should make efforts to reach a real understanding of patients’ needs, experiences, beliefs, and feelings in order to provide patients with humanistic medical care.
